# Supplementary material for: Enhanced moisture repulsion of ceramic-coated separators from aqueous composite coating solution for lithium-ion batteries inspired by a plant leaf surface
Source: Royal Society of Chemistry journal article supplement (doi:10.1039/c6ta01125j), 2016-01-01
Supplement: c6ta01125j1.pdf [file c6ta01125j1.pdf]

## Electronic Supplementary Information

# Enhanced Moisture Repulsion of Ceramic-coated separators from Aqueous Composite Coating Solution for Lithium-Ion Batteries Inspired by surface of Plant Leaf

Sang Woo Kim<sup>a</sup> and Kuk Young Cho<sup>\*,b</sup>

<sup>a</sup> Department of Chemical and Biomolecular Engineering, Korea Advanced Institute of Science and Technology, 291, Daehak-ro, Yuseong-gu, Daejeon, 34141, Korea

<sup>b</sup> Department of Material Science and Chemical Engineering, Hanyang University, 55 Hanyangdaehak-ro, Sangnok-gu, Ansan, Gyeonggi, 15588, Korea

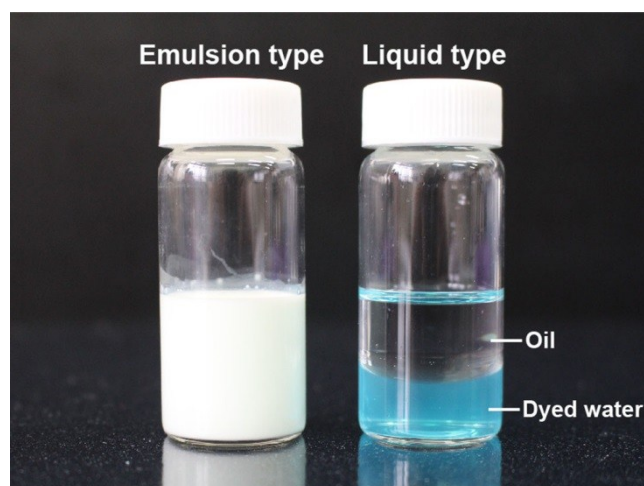

**Figure S1.** Two different types of wax showing well distribution in aqueous solution (left) used in this work and phase separation of conventional liquid oil-type wax in water (right). Water is dyed with blue ink to clearly show the phase separation.

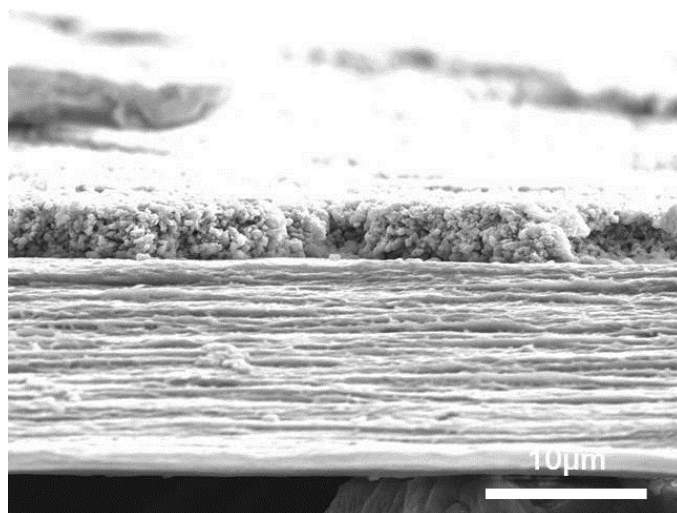

**Figure S2.** Cross-sectional SEM image of the CCS

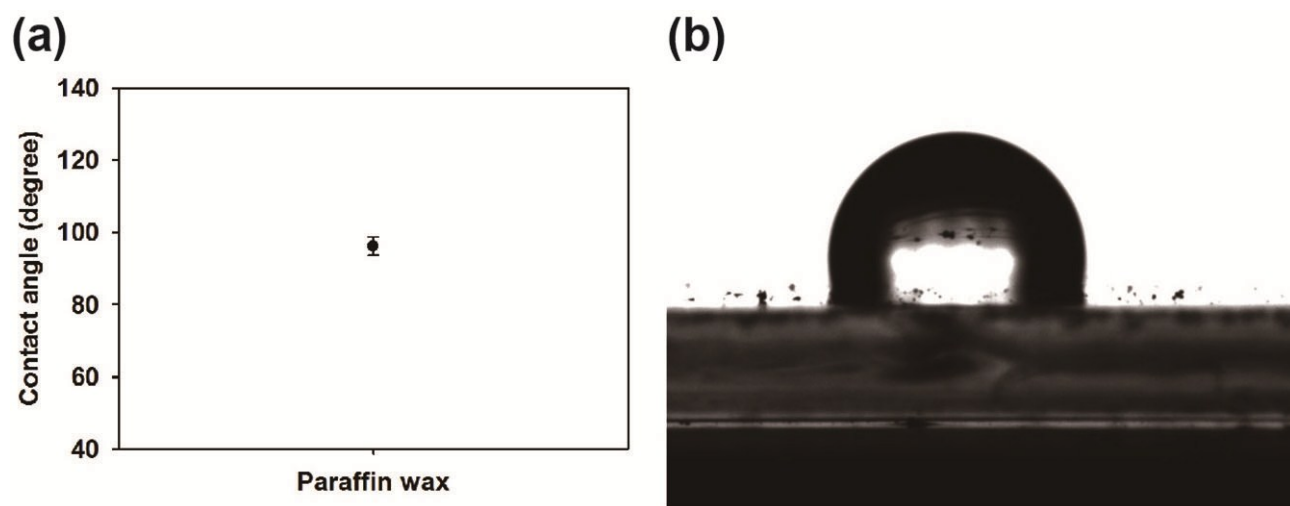

**Figure S3.** Water contact angle (a) of paraffin wax layer coated onto glass substrate (b).

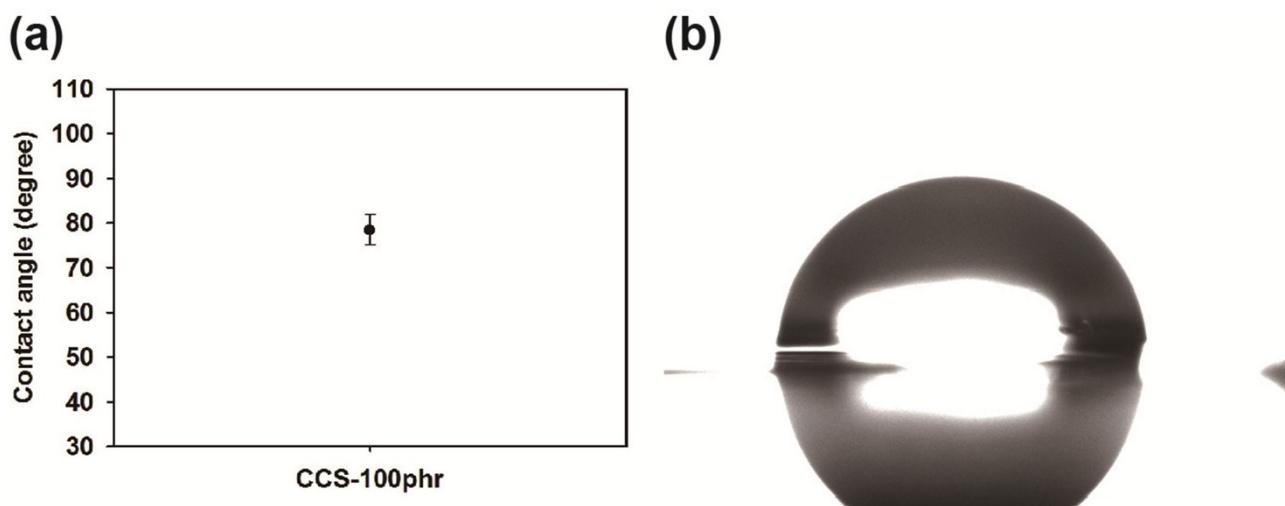

**Figure S4.** Water contact angle (a) of the surface of CCS-100phr (b).

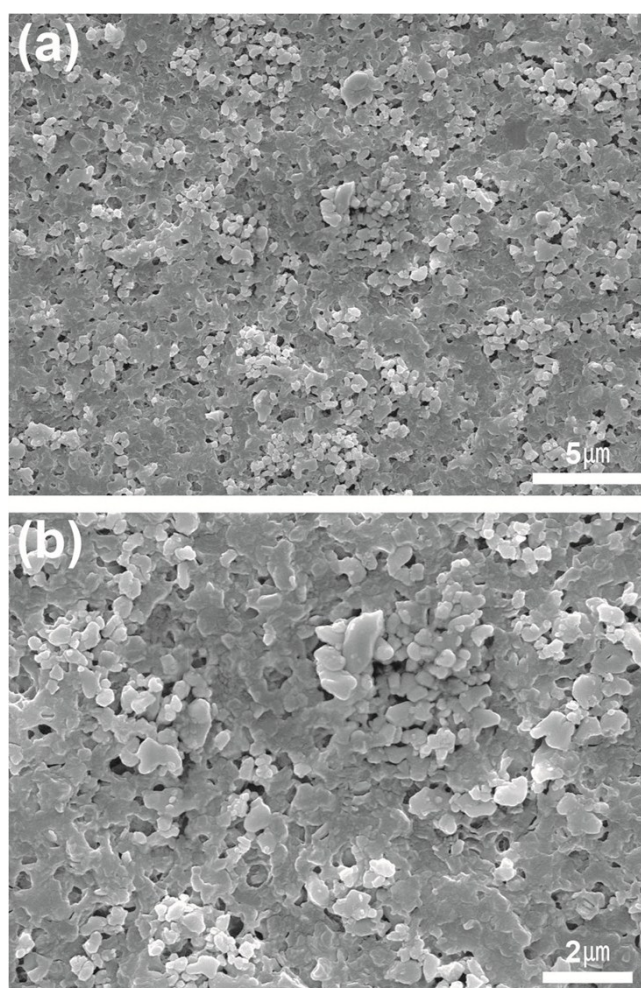

**Figure S5.** SEM image of ceramic-coated separator, CCS-100 phr, showing connection of wax region on the surface.

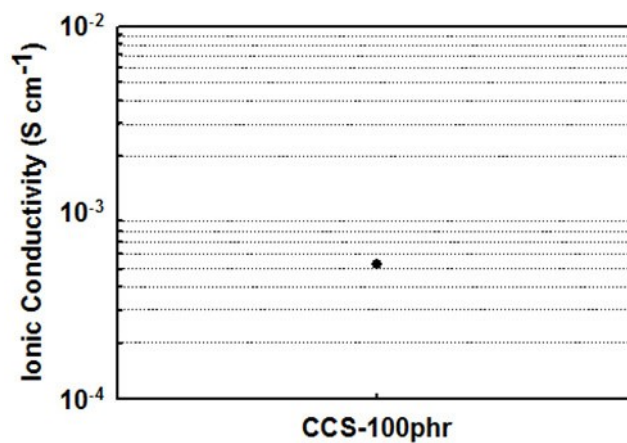

**Figure S6.** Ionic conductivity of cell equipped with CCS-100phr..

**Table S1.** Gurley value of CCS-100phr.

|            | Gurley value(sec/100cc) |
|------------|-------------------------|
| CCS-100phr | 3817.6                  |

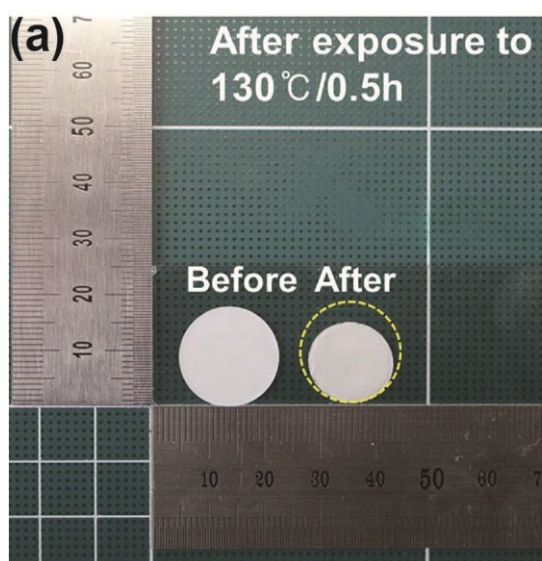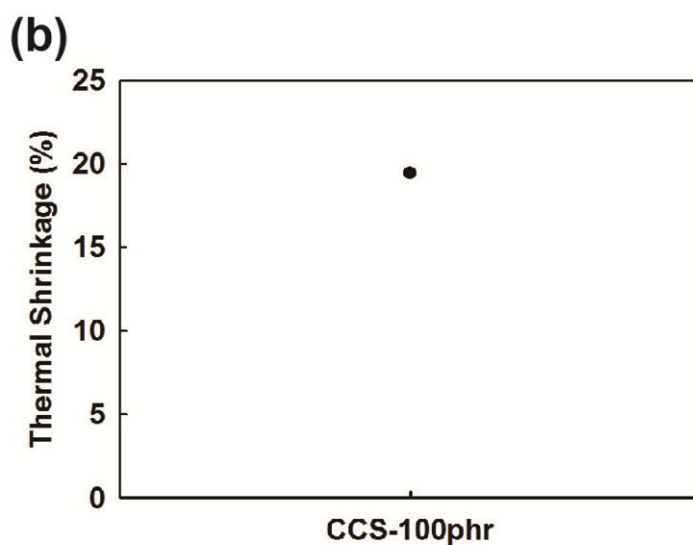

**Figure S7.** Thermal shrinkage of CCS-100phr.
